# Supplementary material
Source: PubMed Central journal article supplement (PMC2845421)
Supplement: tpc.109.071498_1.pdf [file tpc.109.071498_1.pdf]

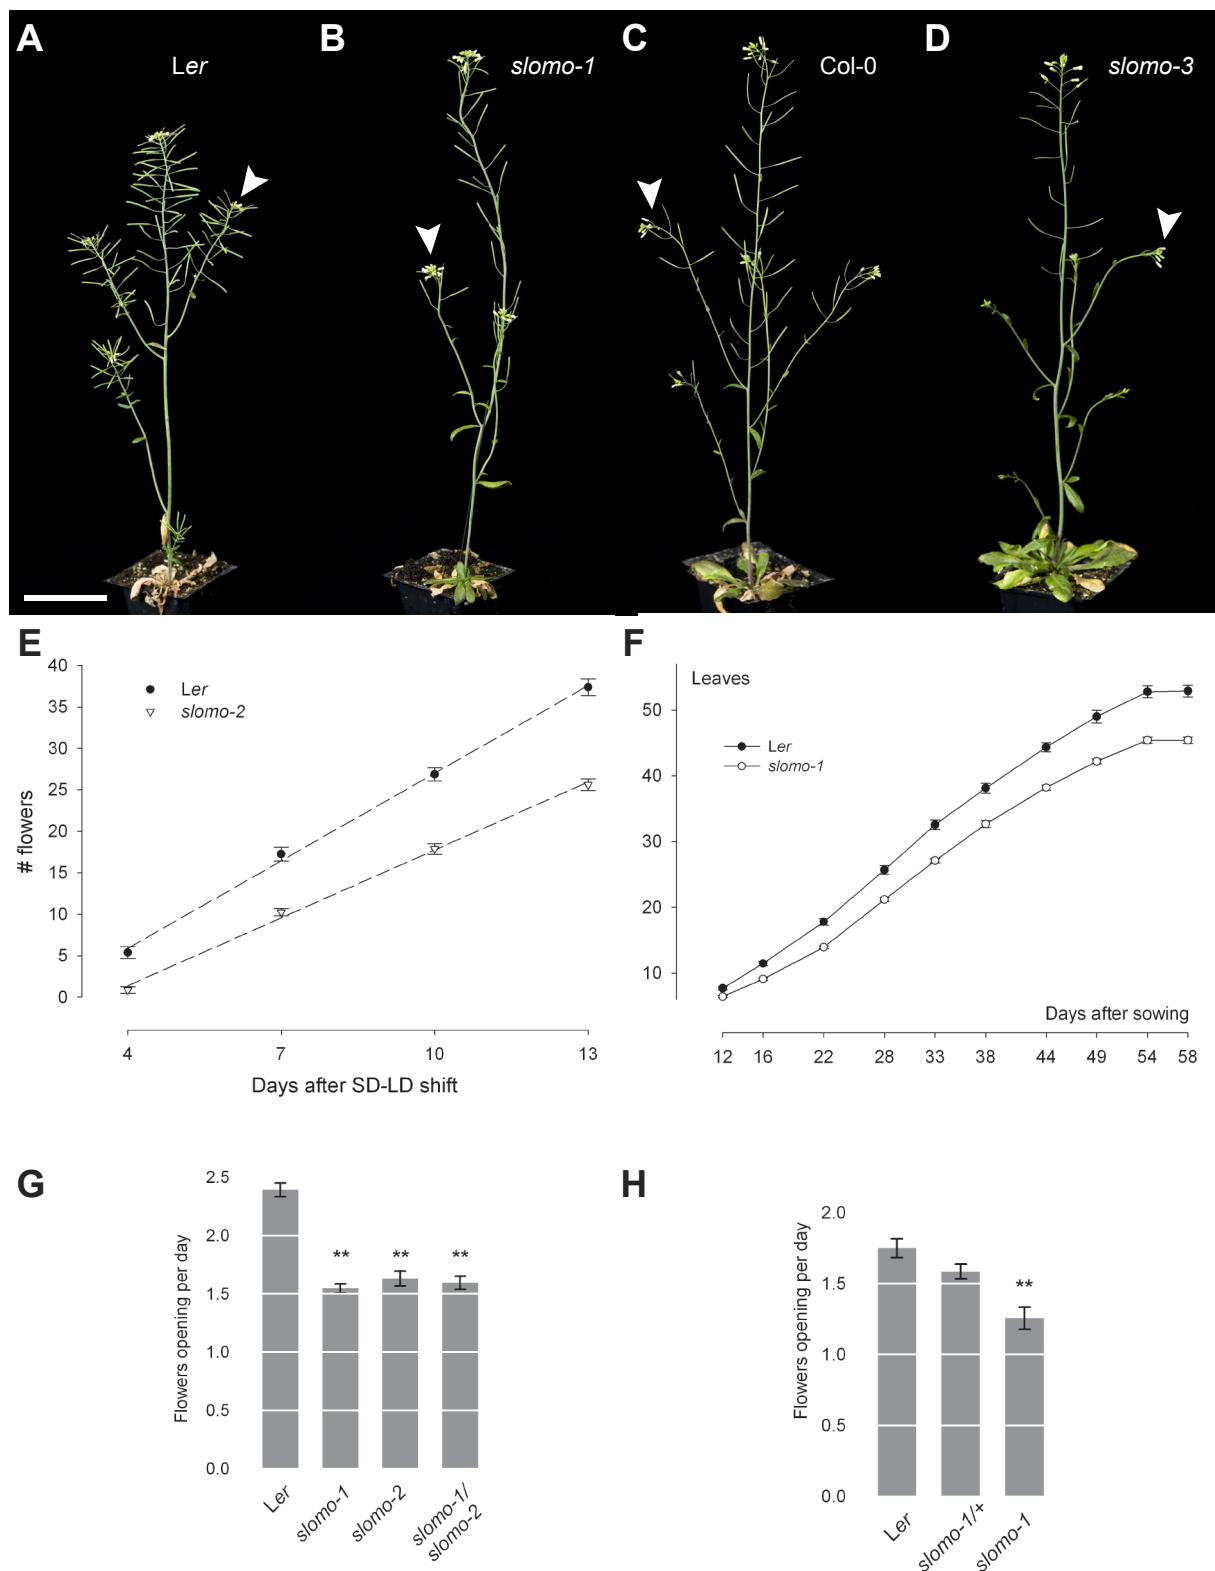

**Supplemental Figure 1: Whole-plant phenotypes and plastochron measurements of *slomo* mutants.**

(A-D) Phenotypes of 40-day-old *Ler* wild-type (A), *slomo-1* mutant (B), Col-0 wild-type (C) and *slomo-3* mutant plants (D). White arrows indicate the youngest lateral inflorescences, highlighting their delayed development in *slomo* mutants. Scale bar in (A) represents 5 cm and applies to all four images.

(E) Rate of flower initiation in *slomo-2* mutants compared to *Ler* wild-type plants. Measurements were done as in Fig. 1G,H.

(F) Leaf formation in short-day-grown *slomo-1* mutants compared to *Ler* wild-type plants. *slomo-1* mutants form fewer leaves overall before flowering at the same time, as indicated by the leveling off of the leaf number after day 54.

(G) Rate of flower formation in F1 plants from a complementation cross of *slomo-1* and *slomo-2* (right bar) compared to wild type and homozygous *slomo-1* and *slomo-2* mutants.

(H) Rate of flower formation in *slomo-1/+* heterozygous plants compared to homozygous genotypes. Measurements were done as in Fig. 3.

Values are mean  $\pm$  SEM from eight (E), nine (F) or at least ten (G,H) plants per genotype. \*\*: different from wild type at  $p < 0.01$ .

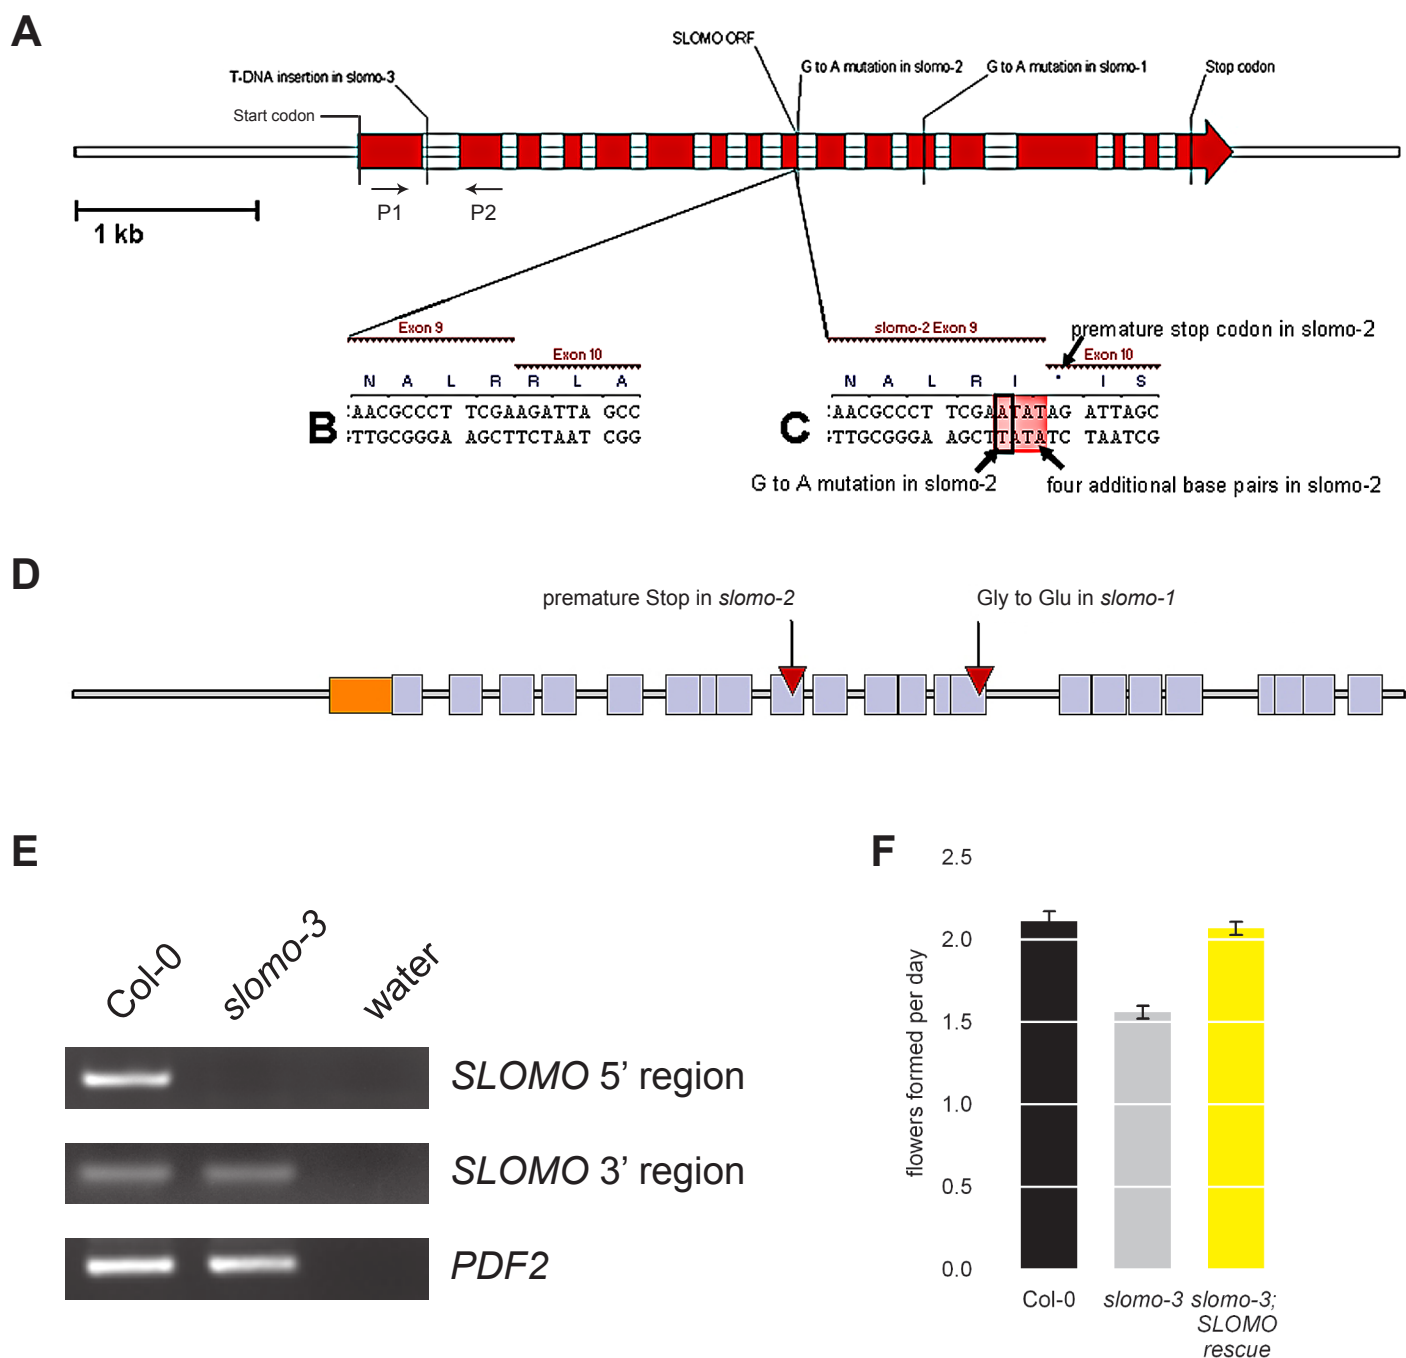

### Supplemental Figure 2: Molecular nature of *slomo* mutant alleles.

(A) Schematic representation of *SLOMO* gene structure. Red/white arrow indicates the transcribed region, with red squares representing exons and white squares introns. P1 and P2 show the positions of the oligonucleotides used for the RT-PCRs (*SLOMO* 5' region) in (E).

(B,C) Detail of the exon-exon junction in the spliced cDNA from the wild type (B) and the *slomo-2* mutant (C). The mutated base of the conserved GT-dinucleotide of the splice donor site is indicated, as are the four additional bases leading to a premature stop codon in the mutant cDNA sequenced from *slomo-2* plants.

(D) Schematic representation of the *SLOMO* protein. Orange square shows the position of the F-box domain and grey squares show the predicted leucine-rich repeats. Positions of the mutations encoded by the *slomo-1* and *slomo-2* mutant alleles are shown (arrows).

(E) RT-PCR on total RNA from Col-0 wild-type and *slomo-3* mutant plants. *slomo-3* mutants do not form full-length *SLOMO* mRNA, although the 3' region downstream of the T-DNA insertion site is still being transcribed. *PDF2* is a constitutively transcribed control gene (AT1G13320; Czechowski et al., 2005). The figure shows one of two technical replicate PCRs performed on one biological replicate of the RNA. Both technical replicates gave the same result

(F) Complementation of the *slomo-3* mutant phenotype by a genomic rescue construct (yellow bar). Measurements were taken as in Fig. 3. Values are mean ± SEM from at least 18 plants per genotype.

At SLOMO 1 MRIWCFSCFTDEDEDEEDDNGGRVKKQSLATAMDNSNGDGFVNFGENERAPRVPRWRLR  
Sl SLOMO 1 MRIWCCLCFGEEEDNKKGYK-----MRDPILGNNGDESPDENSFAFDWRNVFEGV  
Vv SLOMO 1 -----  
Os SLOMO 1 -----MRWTMPPHSWDHDAAGSSRAATHVPPLRCR  
Pp SLOMO 1 -----

At SLOMO 61 LCAEESAAWAELDRFWTSEIPLNQLVQGESSSNVVAEAEDCTMEEADHDSYHKRAKVYS  
Sl SLOMO 51 NVAAVVSPQACAVGDLGVPKNEEIDFDSNWTSSSTVEVKNESYSGEKMLDVNLNLGLSGEA  
Vv SLOMO 1 -----MFVATYYGSCFCGRGCTY  
Os SLOMO 31 DIWHGDNDAGCAIEGAEEGDEEDEEGD-----EDGDRDLQSKRPKVRGFGEEESPQ  
Pp SLOMO 1 -----

At SLOMO 121 GLAECRSVSGVSSDAGNSVSSVERTVSVFGIASSRRTDTDMFCQNFILNYNRKDGKKDDGD  
Sl SLOMO 111 SSSTVLKEDSDPFTCSKRPKVNSFSLDWDNHLLQETSYLCPMNEGGGDVLSNLGATDD  
Vv SLOMO 19 AITAMPLEAGNSSSSTDRDYNVSQSPIPFNNEILRLTSMNSNDSDENPLDSNDGRDEEGD  
Os SLOMO 81 HSGVNASFFGLESITHPGSEDEHGFKLSHCPENELDFGLSLFPNDGVNENPGDGNVGDVE  
Pp SLOMO 1 -----MDSDLVGGDEDGGR

\*\*\*\*\*

At SLOMO 181 DNGSSDTEDEFVHIDLTDDLHMFVFSFLNHVLCRSAMVCRQWRVASAHEDFWRVLNFEN  
Sl SLOMO 171 EGKDSKMEDLDVRMDLTDDLHMFVFSFLDHLDCRAASVCSQWRAASSHEDFWRYLNFEN  
Vv SLOMO 79 GFSTSKMEDLEVRMDLTDDLHMFVFSFLDHLNLCRAAIVCKQWRAGSSHEDFWRYLNFEN  
Os SLOMO 141 ISGGENSEDVEIRMDLSDDLLHLIFSLGQRDLCAGASCQWRASAMHEDFWKCLKFEN  
Pp SLOMO 16 QHNLVDAEDGEARMDLTDDLHMKVFSFLKDVLCQAAKVCQRWRVASAHEDFWKSLNFES

At SLOMO 241 IRISMEQFENMCSRYPNATEVNVYGAPAVNALAMKAATT-LRNLEVLTIGKGHISESFFQ  
Sl SLOMO 231 KOISSNOFEDMCRRYPNATTINLYGTPNIHPLAMKAVSS-LRNLETLSLGRGQLGETFFQ  
Vv SLOMO 139 RNISEEQFEDMCRRYPNATEVNIYGAPSIHSLVMTAMSS-LRNLETTLGKGTLDGDTFFQ  
Os SLOMO 201 TRISLQNFVDICHRYNVTYINLSGVPHAELLVMEAITC-LRHILKTLIMGKGQLGEAFFQ  
Pp SLOMO 76 RQVTHQQVTVLCARYPKATELNKGCPCVDEVVVOQAMLSLRNLEVLTTLGRGFFSDGFFY

At SLOMO 300 ALGECNMLRSVTVSDALGNG-AQEIHLSDRLRELKIKTCRVMRLSIRCPQLRSLSLKR  
Sl SLOMO 290 ALTPCHVLRSLTINDATLGNG-IOEIPISHDSLRLQLVKCRVLRVSIRCPQLETLSLKR  
Vv SLOMO 198 ALADCYMLKRLVNDATLGNG-IOEIPYHDRLHHLQITKCRVLRISVRCPOLETLSLKR  
Os SLOMO 260 LLSECPILTLTVSDASLGSG-IOEVTVNHGDLRELQILKCRALRISVRCSQLQILSLRR  
Pp SLOMO 136 LLSCGESLQNLSTIDATLGSGGAQEIQLKHESLRSLOILKCRVLRITAIRCLFLETLSLKR

At SLOMO 359 SNMSQAMLNCPLLQLDIASCHKLDAAIRSAAISCPQLESLDVSNCSVSDETLREIAQ  
Sl SLOMO 349 SSMPHAVLNCPLLHLDLDIASCHKLSDAAIRSAATACPLLESLDMSNCSVSDETLRDIAQ  
Vv SLOMO 257 SSMAHAVLNCPLLHLDLDIGSCHKLDAAIRSAATS CPPLLESLDMSNCSVSDDTLREIAL  
Os SLOMO 319 TGMHVS LNCPQLVELDFQSCHKLSDAIRQAATACPLLASLDMS SCSCVTDETLREIAN  
Pp SLOMO 196 TGMASAMLYCPRLKLDVSSCHKLS DAGVRAAATACPLLYLDISNCSYVSDETLREISL

At SLOMO 419 ACANLHIINASYCPNISLESVHLPLMLTVLKLHSCGITSASMTWIANS PALEVLELDNCS  
Sl SLOMO 409 TCGHLRVLDASYCPNISLESVRLVMLTVLKLHSCGITSASMAAIAHSYMLVLELDNCS  
Vv SLOMO 317 TCANLHILDASYCPNISLESVRLSMLTVLKLHSCGITSASMAAISHSYMLVLELDNCS  
Os SLOMO 379 SCPNLSVLDASNCPNISLESVRLPMLVDLRLLSCEGITSASMAAIAYSRILEALQLDNCS  
Pp SLOMO 256 ACTHLRSLDASYCPNISLEGVRMPVLTDLKLVNCEGINSSSMAALSFCVMLEVLDAMDYCW

At SLOMO 479 LLTIVSLHLSRLOSISLV-----HCRKFTDLNLQSIMLSSITVSNCPALRRITITSNAL  
Sl SLOMO 469 LLTSVSLDLPRLQSIKLV-----HCRKFIDLNLHCGMLSSITVSNCPLLQORINITSSAL  
Vv SLOMO 377 LLTSVSLFLPRLQNIKLV-----HCRKFVDLNLRSIMLSSITVSNCPALHRINVTSNL  
Os SLOMO 439 LLTSVSLDLPFLKNISLV-----HLRKFALTLRSPVLSYIKVSRCSVLHRVITSNAL  
Pp SLOMO 316 LLTSVILDLPRLRSITFLNWPALWTLHFRGELTLRSPALTLINLSHCALSRIIDIASSSF

At SLOMO 533 RRLALQKQENLTTIVLQCHSLQEVLDLSDCESLNSVCKIFSDDGGCPMLKSLVLDNCESL  
Sl SLOMO 523 KKLVLQKQESLTTIALQCPNLLVLDLTECESLTSNSVCEVFSDDGGGCPVLSLVDNCESL  
Vv SLOMO 431 QKVLVQKQASLTTIALQCYLQEVLDLTDCESLTNSICDVFSDDGGCPMLKSLVLDNCECL

Os SLOMO 493 QKLVLQKQESLSSLSLNCNNLIDVDLSDCESLTNAVCEVFSDDGGGCPILRLSLILDNCESL  
Pp SLOMO 376 EKLCCKKNQMGSSLALQCPWLRVVDLTDCESLTDSVCDVFGDDGGGCPKLDLLTLDNCDGL

At SLOMO 593 TAVRFNCSSLASLSLVGCRVTSLELKCPRIEQICLDGCDHLETAFFQPVVALRSLNLGIC  
Sl SLOMO 583 TLVAFCSLSLVSLGGCRALISLALRCPYLEQVSLDGC DHLEVASFCPVGLRSLNLGIC  
Vv SLOMO 491 TAVGFRSTSLVSLVGCRAITSLELVCPYLEQVHLDGCDHLERASFRPVGLRSLNLGIC  
Os SLOMO 553 STVELNSSSMVNLSLAGCRSMTLKLSCPNLQNVNLDGCDHLERASFCPVGLESLNLGIC  
Pp SLOMO 436 VKVKLMASSLRALS LVGCRNMTSLELSCPILQSLQLDGRNRLVAASFSPVGLVSLNLGIC

At SLOMO 653 PKLSVNLNIEAPYMVSLLEKGC\*GVLSEASTMCPLLTSLDASFCSQLRDDCLSATTASCPLI  
Sl SLOMO 643 PKNMLHIEAPOMASLELKGCGVLSEASINCPLLTSFDASFCSQLKDDCLSATTSSCPLI  
Vv SLOMO 551 PKLSALHIEAPSMQLELKGCGGLSEASINCPMLTSLDASFCSKLKDDCLSATAASCPI  
Os SLOMO 613 PKLSDLHIEAPKMSLELKGCGVLSSQASINCPRLTSLDASFCSRKLMDDSLSQTAEACPLI  
Pp SLOMO 496 PHLITLIEAQAOMITLDRGC\*GLSQASIRCSNLSLSDASYCSRIGDDCLAATTASCSAI

At SLOMO 713 ESLVLMSCPSIGSDGLSSINGLPNLTVLDLSYTFMLNLEPVFKSCIQLKVLKLQACKYLT  
Sl SLOMO 703 ESLVLMSCPSVGC DGLSLQSLPNLTYLDLSYTFVLTLPVYESCLQLKVLKLQACKYLT  
Vv SLOMO 611 ESLVLMSCPSVGYEGLSSRLLPHLTLLDLSYTFMLNLPVFESECLQLKVLKLQACKYLT  
Os SLOMO 673 ENLILSSCVSIDLNGLSSLHCLHKLALLDLSYTFMLNLPVFDSCPOLKILKLSACKYLS  
Pp SLOMO 556 QTLVLAACPVKVGPAGLLALKLPRLTMLDLSYTFMLTDLSPVFEACPYLKVLRSLACKYLG

At SLOMO 773 DSSLEPLYKEGALPALEELDLSYGILCQTATDILLACCTHLTHVSLNGCVNMHDLDWGST  
Sl SLOMO 763 DTSLLEPLYKENALPALCELDLSYGILCQSAIEELLACCTHLTHVSLNGCINMHDLNMGFS  
Vv SLOMO 671 DSSLEALYKEGALPALCELDLSYGALCQSAIEELLACCTHLTHVSLNGCINMHDLNMGFS  
Os SLOMO 733 DSSLDALYREGALPMLVELDLSYSSIGQTATIEELLSCCTNLVNVNNGCTNLHQLVCGSD  
Pp SLOMO 616 DTALNALHGGKVLPOLEELDMSYGLGRAAIEGVLALCPHLTQVSLNGCLHVTDQLWSRL

At SLOMO 833 SVHLEFDYFGVY-----SSSDNTQEPAETANRLLQNLNCVGCNPNIKVLIPPAARFYHLST  
Sl SLOMO 823 GDQLSQIPSVS-IPHVSSLGEQQLSNEQPKRLEENLNCVGCNPNIKKVLIP-MAQGFLLSS  
Vv SLOMO 731 SGPSTSEIPSYNTSSLSHGDDELIEQPRLQNLNCVGCQNIKKVLIPPMARCTHLSS  
Os SLOMO 793 DCSSGDMFVDVCPD-SAPVRSEIISERSDRLLEVNLCTGCPNIKKVITPSMTTYLRLSK  
Pp SLOMO 676 ATPP-----

At SLOMO 888 LNLSSVNLKEVDLTCSNLVLNLSNCCSLEVLKLGCPRLASLFLQSCNMDE-AGVEAAI  
Sl SLOMO 881 LNLSSGNLKEVDIACYNLCVNLNLSNCCSLESLELQECPRLSSFLQSCNVDE-ESVEAAV  
Vv SLOMO 791 LNLSSANLKEVDVACYNLCFLNLSNCCSLEILKLECPRLTSLFLQSCNITV-EAVEAAI  
Os SLOMO 852 LNLNLSLNLKEVDLTCSNLYTLNLSNCCSLEVLKLDLCPRLTNLQLLACTMLQDEEIESAI  
Pp SLOMO 680 ---FPIELMASEDTGMEDVSSSDNHQCSALVVLQNLNCPRLITLTLQSCGIAA-EMIEDAI

At SLOMO 947 SGCSSELETLDLRFCKPSSVSMKFRITVCPSLKRVFSSPNLLQD  
Sl SLOMO 940 SRCMMLETLDVRFCKPICPLNMTLRVACPSLKRFSS-----  
Vv SLOMO 850 SCNMLETLDLRFCKPLSNASMKTLRAVCPSLKRFSSL-----  
Os SLOMO 912 SRCSALETILNVHSCPKNVLDLFRRLRVCPSLKRIQSSLIT---  
Pp SLOMO 736 RGCSELETLDVRHCTKVSASVLRIRICPGLKRLYSTSSA---

### Supplemental Figure 3: Sequence alignment of SLOMO and related proteins from other plant species.

Identical amino acids are highlighted in black, similar ones in gray. Asterisks indicate the position of the F-box. The glycine highlighted in red (arrow) is the one mutated to glutamate in the *slo-mo-1* allele.

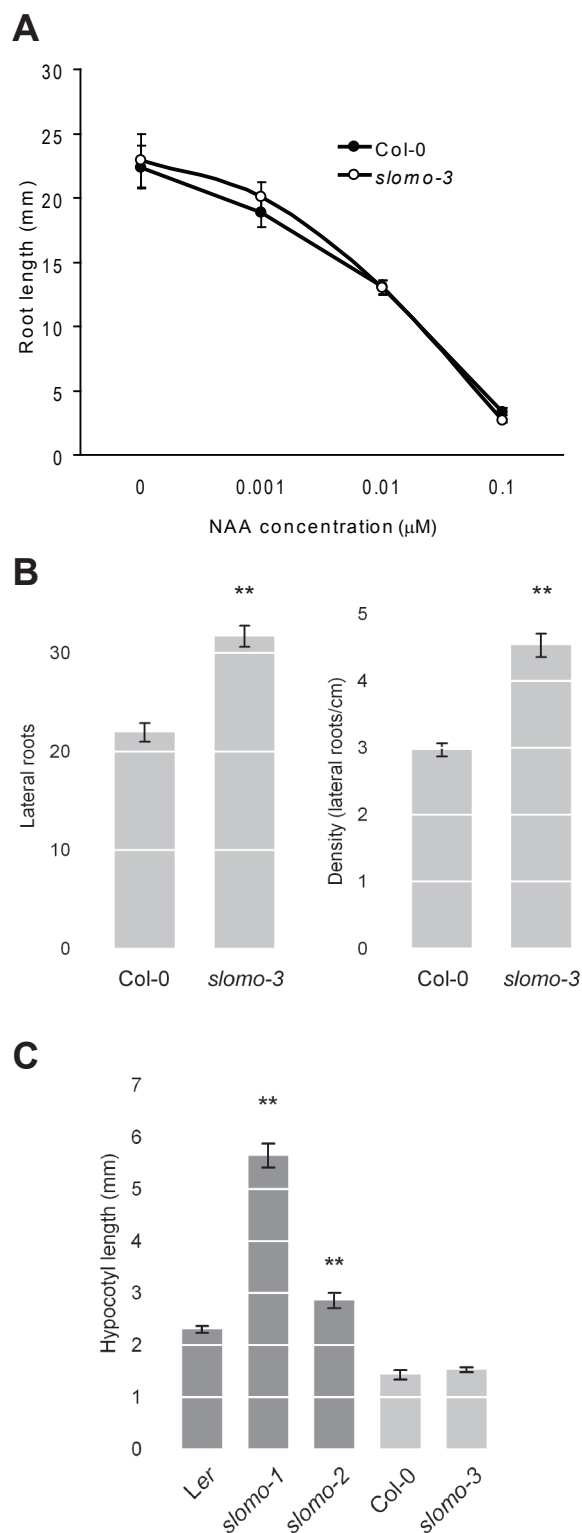

**Supplemental Figure 4: *slomo* mutants show normal auxin sensitivity, but form more lateral roots and longer hypocotyls.**

(A) Quantification of root length of Col-0 and *slomo-3* mutants after growth on medium with increasing concentrations of the auxin NAA.

(B) *slomo-3* mutants grown on medium without external auxin form more lateral roots overall and have a higher density of lateral roots than Col-0 wild-type plants.

(C) Hypocotyl lengths of *slomo* mutants compared to wild-type strains after growth in long-day conditions.

Values are mean  $\pm$  SEM from at least 16 plants per genotype. \*\*: significantly different from wild type at  $p < 0.01$  (Student's t-test).

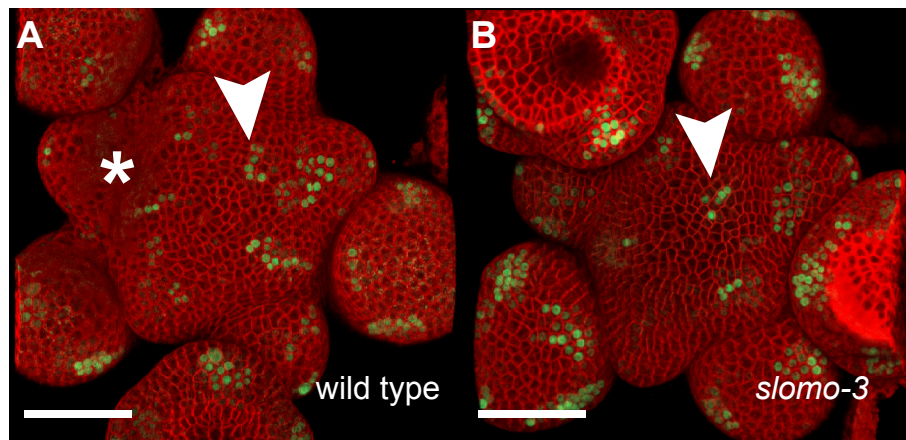

**Supplemental Figure 5: The pattern and levels of *ProDR5* promoter activity are unchanged in *slomo* mutants.**

(A,B) Projected z-stacks of confocal micrographs of the inflorescence meristem from wild-type (A) or *slomo-3* (B) plants expressing the auxin-responsive *ProDR5:VENUS* reporter (Heisler et al., 2005). Arrowheads indicate the position where the next primordium will be initiated. The asterisk in (A) indicates slight damage to the meristem during preparation. YFP-fluorescence is shown in green, while red represents fluorescence of the membrane dye FM4-64. Scale bars are 50  $\mu$ m.

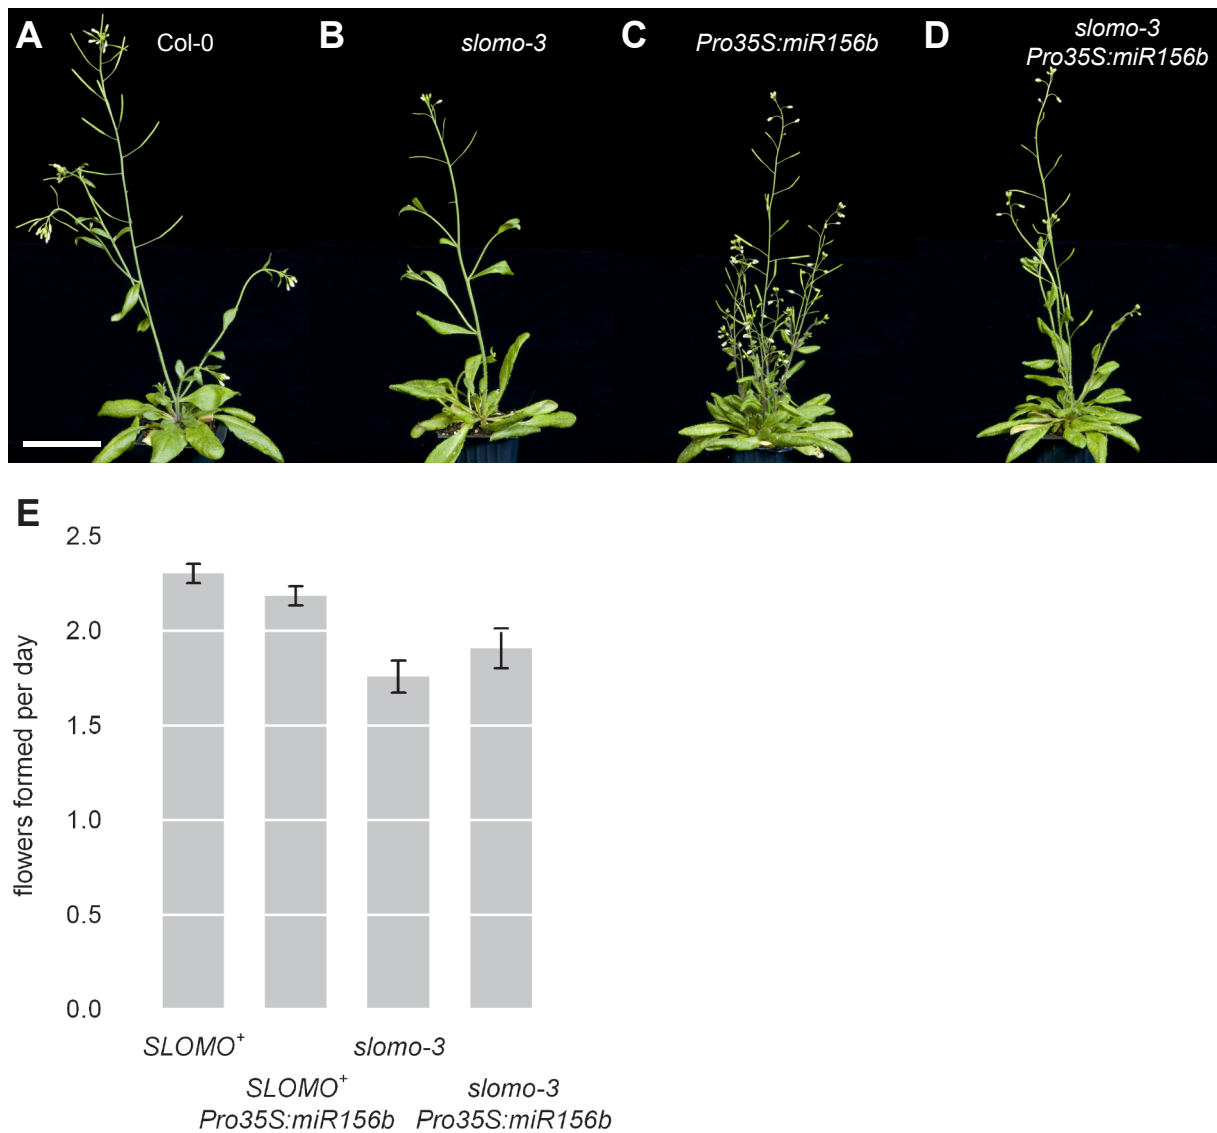

**Supplemental Figure 6: Genetic interactions between *SLOMO* and *miR156*.**

(A-D) Whole-plant phenotypes of 30-day-old plants.

(A) Col-0 wild type.

(B) *slomo-3* mutant showing slightly delayed development of lateral inflorescences.

(C) *Pro35S:miR156b* overexpressing plant with reduced apical dominance.

(D) *slomo-3 Pro35S:miR156b* plant with intermediate phenotype in terms of apical dominance.

(E) Quantification of the rate of flower formation in the indicated genotypes. Values are mean  $\pm$  SEM from at least nine plants per genotype.

Scale bar in (A) represents 4 cm and applies to all four images (A-D).

**Supplemental Table 1: Markers used for mapping the *SLOMO* gene.**

| Marker    | Chromosome | Approximate location (kb) | BAC    | Forward primer (5'-3')    | Reverse primer (5'-3') | Annealing temperature (°C) | Length of product from <i>Ler</i> allele (bp) | Length of product from <i>Col</i> allele (bp) |
|-----------|------------|---------------------------|--------|---------------------------|------------------------|----------------------------|-----------------------------------------------|-----------------------------------------------|
| AL049915  | 4          | 15,818                    | T16I18 | CGGCTATGAGTATCAAAGGAA     | GACGATGAGAACGACACC     | 55                         | 271                                           | 235                                           |
| CER451516 | 4          | 15,955                    | F26P21 | GGGTTCACCTTTTAAAGTTTCAA   | AAACCCCAAAACCATCTG     | 55                         | 137                                           | 150                                           |
| CER449763 | 4          | 16,241                    | F17I5  | TAATTATGGTGGGCTCTCTGC     | GCCACCACAATCATTCTCA    | 55                         | 177                                           | 193                                           |
| TWC10     | 4          | 17,376                    | AP21   | CAGATAAATATCTCCCGTTATATAG | GGACATGCAAGATGGTGGACG  | 46                         | 141                                           | 153                                           |

The *SLOMO* coding region (including introns) is located between 16,015,971 bp and 16,020,697 bp on chromosome 4.

kb: kilobase-pair; bp: base-pair; *Ler*: Landsberg *erecta*; *Col*: Columbia



**Supplemental Table 2: Oligonucleotides for PCR-genotyping and RT-PCR**

| Primer name           | Sequence (5' - 3')              | Restriction enzyme                        | Remarks                                                                                                        |
|-----------------------|---------------------------------|-------------------------------------------|----------------------------------------------------------------------------------------------------------------|
| slomo-1_dCAPS_for     | CATTCTCCAACCTGTGAGTGTTAC        | ApaLI, cuts product from wild-type allele |                                                                                                                |
| slomo-1_dCAPS_rev     | TAATGGATGCTTCAGACAGTGCA         |                                           |                                                                                                                |
| slomo-2_dCAPS_for     | TCAACCTGCAGATATTGTGATGAG        | XmnI, cuts product from mutant allele     |                                                                                                                |
| slomo-2_dCAPS_rev     | CAATAACAAAACCATCATAACTAAGAACATA |                                           |                                                                                                                |
| slomo-3_RT-PCR_for    | TCAGTTGGTTCAGGGTGAGAGT          | Salk_Lba                                  | 3-primer PCR to genotype slomo-3 allele; product from mutant allele longer than from wild-type allele          |
| slomo-3_3xgeno_rev    | CCACCGACGAAACAGAATTCC           |                                           |                                                                                                                |
| Salk_Lba              | TGGTTCACGTAGTGGGCCATCG          |                                           |                                                                                                                |
| 1642 dCAPS F<br>HinfI | GGTGAAGTTGAAGTGAAAAAGATCGTTC    | HinfI, cuts product from mutant allele    |                                                                                                                |
| 1642 dCAPS R<br>HinfI | CTTGGAAGTCAAACCAACGAAGGAA       |                                           |                                                                                                                |
| pid-1_dCAPS_for       | CCGGCGATGTTACGAGAATCAG          | BclI, cuts product from mutant allele     |                                                                                                                |
| pid-1_dCAPS_rev       | TCTCTGCGTAAGCGAAATCTGATGATC     |                                           |                                                                                                                |
| pid-2_dCAPS_for       | CCGTTGTTGCGCCGACTAATG           | BglII, cuts product from mutant allele    |                                                                                                                |
| pid-2_dCAPS_rev       | CTTTAACCTCCGCCGACCTCGCCGAGATC   |                                           |                                                                                                                |
| pin1_genotype_for     | CCAAAATTTCTCTATGTCCTTCGA        | Salk_Lba                                  | 3-primer PCR to genotype pin1 (GK_051A10) allele; product from wild-type allele longer than from mutant allele |
| pin1_genotype_rev     | AAACTACCTGGATAATGGCAACATG       |                                           |                                                                                                                |
| o8409                 | ATATTGACCATCATACTCATTGC         |                                           |                                                                                                                |
| slomo-3_RT-PCR_for    | TCAGTTGGTTCAGGGTGAGAGT          | Salk_Lba                                  | test for expression of full-length mRNA in slomo-3 mutants                                                     |
| slomo-3_RT-PCR_rev    | TCATCCTTTTCCCATCTTCC            |                                           |                                                                                                                |

Primers for RT-PCR against the constitutively expressed *PDF2* have been described before (Anastasiou et al., 2007).

## SUPPLEMENTAL METHODS

### Molecular cloning and plant transformation

To generate the *ProSLOMO:GUS* and the *ProSLOMO:vYFP<sub>er</sub>* reporters, a 1.8 kb-fragment of the *SLOMO* 5' genomic region up to the start codon was amplified using T3-primer and oligo pSLOMO\_rev\_KpnI (5' – CATGGTACCCCTAAGCCACCT – 3') on pDL22 as template. The resulting product was digested with *Sac*I and *Kpn*I and subcloned into pBlueML2AP:NLSGUS and pBlueML2AP:vYFP<sub>er</sub> to give plasmids pDL24 and pDL25, respectively. From there, the *ProSLOMO:GUS* and *ProSLOMO:vYFP<sub>er</sub>* fragments were subcloned via *Asc*I-sites into pBarMAP.

To generate the *SLOMO* rescue construct used in Supplemental Figure 2F, nucleotides 88794 to 96725 of BAC F4I10 (GenBank ID: 4455321) were subcloned into pBlueML2AP to give plasmid pDL22. From there, the insert was subcloned as an *Asc*I-fragment into pML997.

Plants were transformed using 'floral dip' (Clough and Bent, 1998).

## **SUPPLEMENTAL REFERENCES**

- Anastasiou, E., Kenz, S., Gerstung, M., MacLean, D., Timmer, J., Fleck, C., and Lenhard, M.** (2007). Control of plant organ size by KLUH/CYP78A5-dependent intercellular signalling. *Dev Cell* **13**, 843-856.
- Clough, S.J., and Bent, A.F.** (1998). Floral dip: a simplified method for *Agrobacterium*-mediated transformation of *Arabidopsis thaliana*. *Plant J* **16**, 735-743.
- Czechowski, T., Stitt, M., Altmann, T., Udvardi, M.K., and Scheible, W.R.** (2005). Genome-wide identification and testing of superior reference genes for transcript normalization in *Arabidopsis*. *Plant Physiol* **139**, 5-17.
- Heisler, M.G., Ohno, C., Das, P., Sieber, P., Reddy, G.V., Long, J.A., and Meyerowitz, E.M.** (2005). Patterns of auxin transport and gene expression during primordium development revealed by live imaging of the *Arabidopsis* inflorescence meristem. *Curr Biol* **15**, 1899-1911.
